# Supplementary material for: SERS diagnosis of liver fibrosis in the early stage based on gold nanostar liver targeting tags
Source: Royal Society of Chemistry journal article supplement (doi:10.1039/d1bm00013f), 2021-01-01
Supplement: d1bm00013f1.pdf [file d1bm00013f1.pdf]

# **SERS diagnosis of liver fibrosis in early stage based on gold nanostars liver targeting tags**

Songtao Xiang,<sup>a</sup> Lin Lu,<sup>a</sup> Hua Mao,<sup>\*a</sup> and Huiqing Zhong,<sup>b</sup>

<sup>a</sup> Department of Digestive Medicine, Zhujiang Hospital, Southern Medical University, Guangzhou 510282, China

<sup>b</sup> State Administration of Traditional Chinese Medicine, State Institute of Biophotonics, South China Normal University, Guangzhou 510631, China

## **1. Serological detection and HE staining**

According to optimal accumulation time, GNSs and GLTTs were injected into the tail vein of normal group A<sub>1</sub>, A<sub>2</sub> and model group B<sub>1</sub>, B<sub>2</sub>. The mice were sacrificed by overdose anesthesia, and blood was collected from heart using anticoagulant tube. Then centrifuge for 5 min at the speed of 3000 r/min, and the upper serum was collected. Refer to kit instructions, alanine aminotransferase (ALT) and aspartate aminotransferase (AST) indexes were tested, and the indexes of hyaluronic acid (HA), laminin (LN), type III procollagen (PC-III) and type IV collagen (C-IV) in liver tissue serum were also detected. The serum was prepared as follows: Left lobe of the mice liver was mixed with 0.9% saline to make 10% liver tissue homogenate. with a 2000 G centrifugation for 10 min, the upper serum was collected for subsequent detection.

Liver tissue was fixed with 10% formalin solution, paraffin-embedded and sectionalized. HE staining was used for histopathological diagnosis.

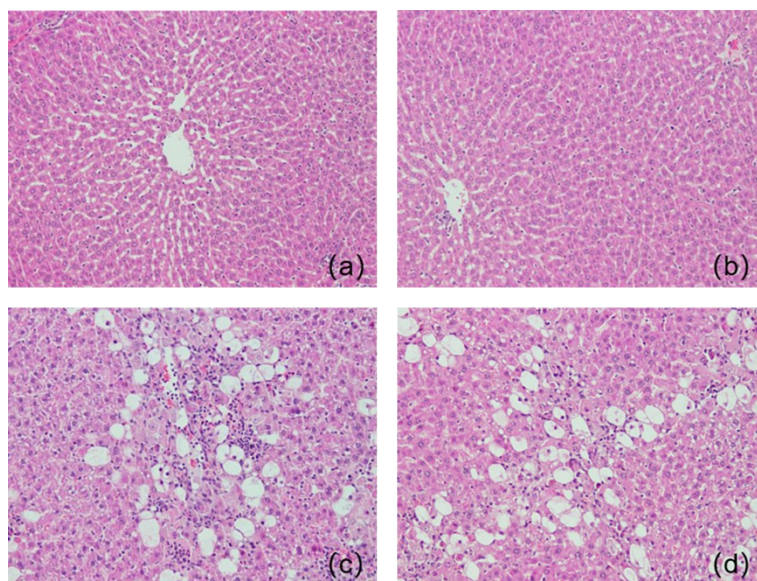

Figure S1. Micrographs of pathological sections of mice liver tissues in each group (HE dyed,  $\times 200$ ) (a) normal tissue & GNSs; (b) normal tissue & GLTTs; (c) liver fibrosis tissue & GNSs; (d) liver fibrosis tissue & GLTTs.

Table S1. Serum liver fibrosis indexes in normal group ( $A_1$ ,  $A_2$ ) and model group ( $B_1$ ,  $B_2$ ) ( $\bar{x} \pm s$ , ng/mL,  $n=15$ )

| Group          | HA              | LN              | C-IV               | PC-III           |
|----------------|-----------------|-----------------|--------------------|------------------|
| Group $A_1$    | $2.26 \pm 0.36$ | $1.24 \pm 0.20$ | $129.70 \pm 7.38$  | $55.16 \pm 4.84$ |
| Group $B_1^*$  | $4.94 \pm 0.63$ | $1.94 \pm 0.16$ | $279.67 \pm 16.30$ | $94.43 \pm 5.23$ |
| Group $B_2^\#$ | $4.73 \pm 0.65$ | $1.97 \pm 0.15$ | $277.82 \pm 15.90$ | $95.65 \pm 5.94$ |
| Group $A_2$    | $2.27 \pm 0.30$ | $1.28 \pm 0.14$ | $127.46 \pm 11.00$ | $54.42 \pm 4.32$ |
| Group $B_1^*$  | $4.94 \pm 0.63$ | $1.94 \pm 0.16$ | $279.67 \pm 16.30$ | $94.43 \pm 5.23$ |
| Group $B_2^\#$ | $4.73 \pm 0.65$ | $1.97 \pm 0.15$ | $277.82 \pm 15.90$ | $95.65 \pm 5.94$ |

Note: Compared with normal group  $A_1$  and  $A_2$ ,  $^*P < 0.01$ ,  $^\#P < 0.01$ .

Normal Group  $A_1$ : normal tissue & GNSs; Normal Group  $A_2$ : normal tissue & GLTTs; Model group  $B_1$ : liver fibrosis tissue & GNSs; Model group  $B_2$ : liver fibrosis tissue & GLTTs.

Table S2. Serum liver function indexes in normal group ( $A_1$ ,  $A_2$ ) and model group ( $B_1$ ,  $B_2$ ) ( $\bar{x} \pm s$ , IU/L,  $n=15$ )

| Group                | AST (aspartate aminotransferase) | ALT (alanine aminotransferase) |
|----------------------|----------------------------------|--------------------------------|
| Normal group A       | $63.64 \pm 4.59$                 | $47.23 \pm 5.97$               |
| Model group A $^*$   | $149.68 \pm 12.28$               | $172.56 \pm 10.65$             |
| Model groups B $^\#$ | $152.67 \pm 11.74$               | $174.38 \pm 9.30$              |
| Normal group B       | $60.60 \pm 4.04$                 | $47.85 \pm 5.88$               |
| Model group A $^*$   | $149.68 \pm 12.28$               | $172.56 \pm 10.65$             |
| Model group B $^\#$  | $152.67 \pm 11.74$               | $174.38 \pm 9.30$              |

Note: Compared with normal group A<sub>1</sub> and A<sub>2</sub>, \*P<0.01; #P<0.01.

Normal Group A<sub>1</sub>: normal tissue & GNSs; Normal Group A<sub>2</sub>: normal tissue & GLTTs; Model group

B<sub>1</sub>: liver fibrosis tissue & GNSs; Model group B<sub>2</sub>: liver fibrosis tissue & GLTTs.

## 2. Studies on biosafety of GNSs and GLTTs

### a. Cytotoxicity test

Carefully remove the frozen human liver cancer cell HepG2 from the liquid nitrogen tank, put them in a 37 °C water bath quickly, and transfer them to a sterile 4 mL EP tube after a complete dissolution. After centrifugation at 1500 G for 5 min, the supernatant was discarded, and the cells were dispersed with DMEM medium (10% fetal bovine serum, 100 IU/mL penicillin and 100 mg/mL streptomycin were added). With 5% CO<sub>2</sub> culture at 37 °C, and after 2~3 generations, the cells in good condition were used to follow-up experiments.

The concentration of GNSs and GLTTs was fixed at 20 nmol/L, and the final concentrations were set to 0.00, 2.50, 5.00, 10.00 and 15.00 nmol/L respectively. Then they were incubated with HepG2 cells for 24, 48 and 72 h. 6 replicate wells at each time point and different blank controls were set. At each time point, 20 µL MTT (5 mg/mL) was added into each well and incubated for 4 hours. Next, add 200 µL DMSO and shake well to fully dissolve the crystals. Finally, the absorbance at 490 nm wavelength was measured, and the cell inhibition rate of each group was calculated. Cell inhibition rate = (control group-experimental group) / control group × 100%.

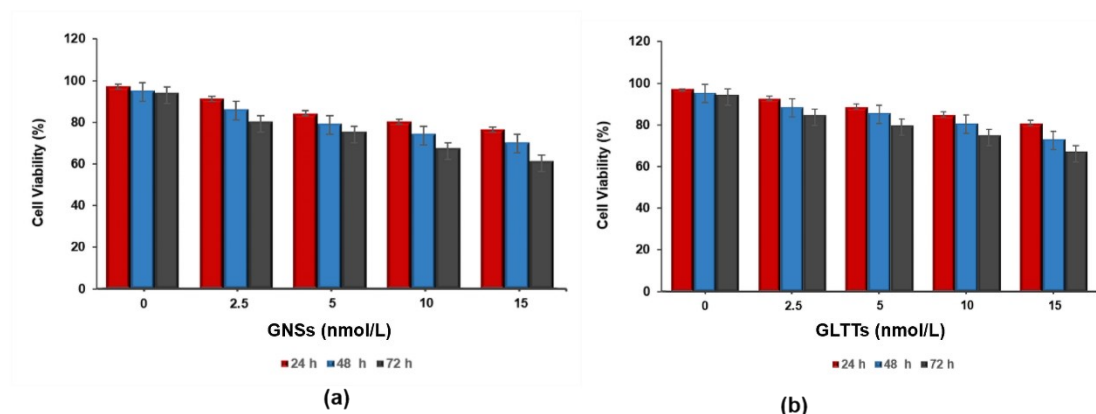

Figure S2. Cell viability of different concentrations of GNSs(a) and GLTTs(b) co-incubation with HepG2 cells at different times.

### b. Survival analysis

30 mice in normal group were divided into 3 groups, namely the control group (A<sub>3</sub>), GNSs group

(A<sub>4</sub>), and GLTTs group (A<sub>5</sub>). 200  $\mu$ L GNSs and GLTTs with the concentration of 20 nmol/L were injected every day, and the control group was injected with the same volume of normal saline. The survival of the three groups within 45 days was recorded, and the survival rate was calculated.

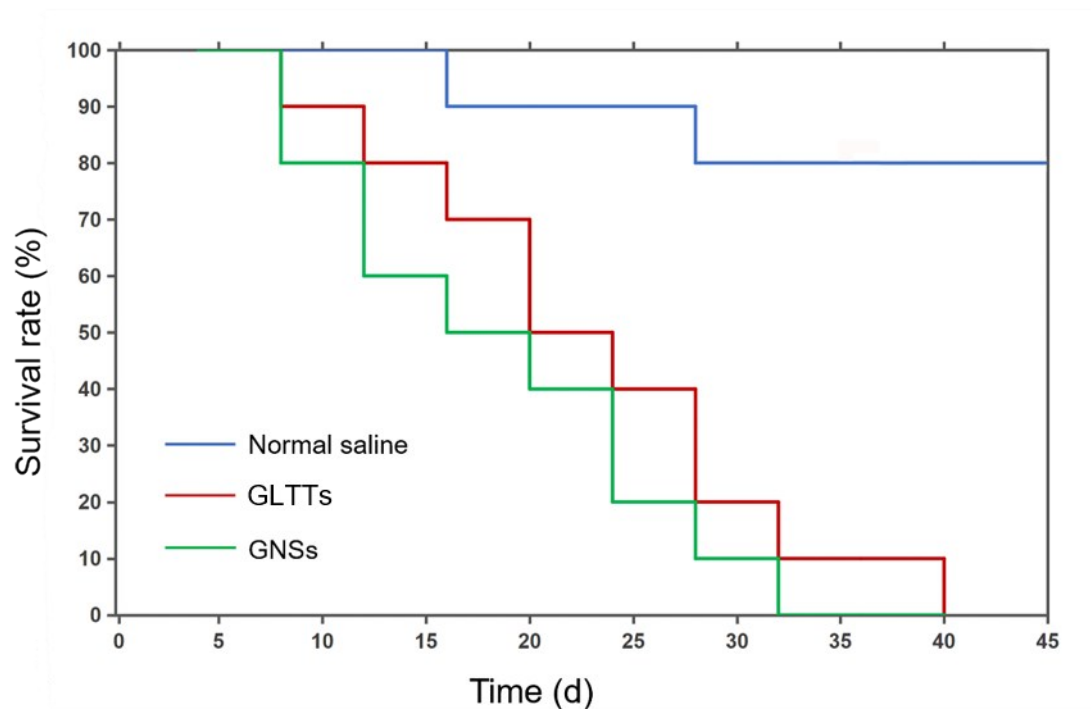

Figure S3. Survival curves of mice injected with saline, GNSs, and GLTTs through tail vein in 45 days.
